# Supplementary material
Source: publisher figshare collection journal article supplement (https://future-science-group.figshare.com/ndownloader/files/31404541)

**Supplementary material**

**Supplementary Figure 1.** **Kaplan-Meier analysis of overall survival by line of therapy.** **(A)** First-line therapy, **(B)** second-line therapy, **(C)** third-line therapy and **(D)** fourth-line therapy.


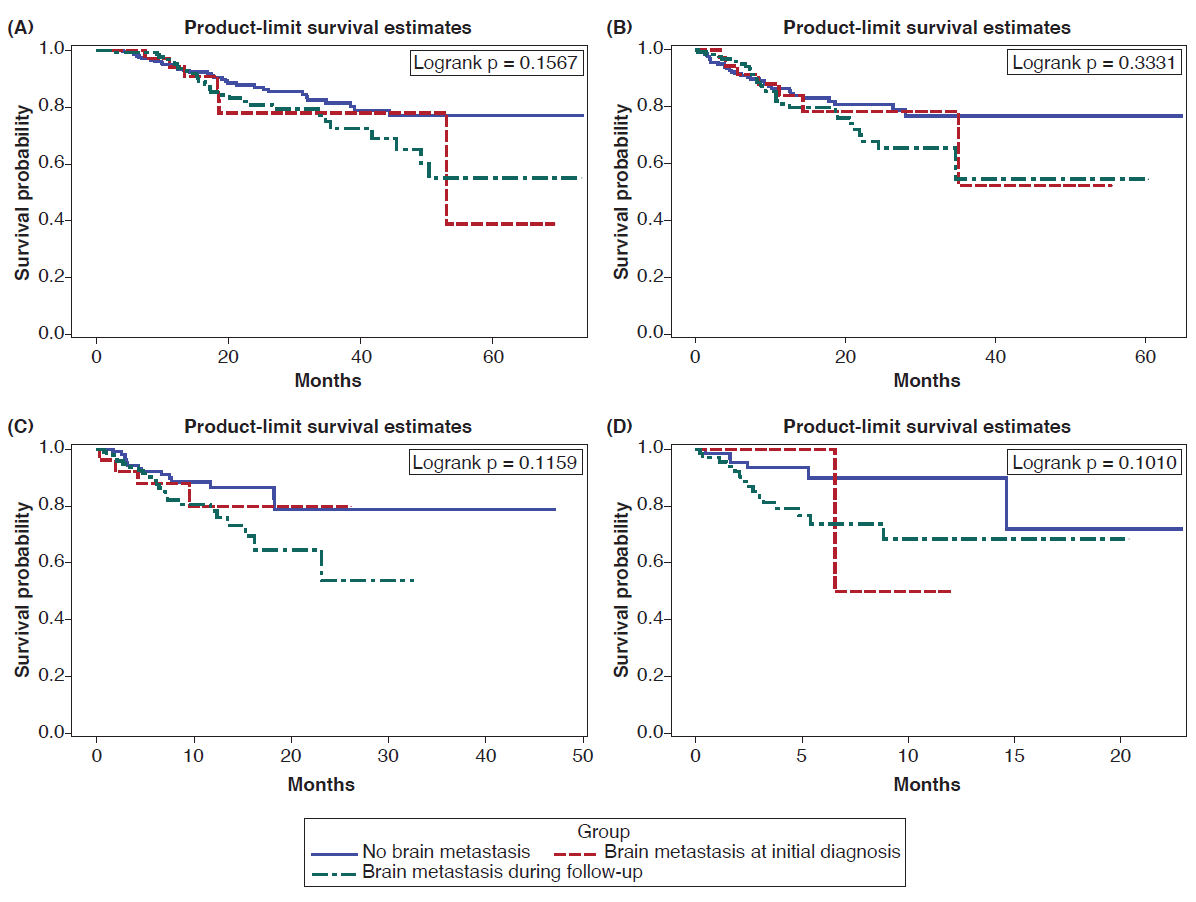

Supplement: Supplementary file 1 [file 31404541]
